# Supplementary material for: Purified regenerating retinal neurons reveal regulatory role of DNA methylation-mediated Na+/K+-ATPase in murine axon regeneration
Source: PubMed Central journal article supplement (PMC9886953; doi:10.1038/s42003-023-04463-4), 2023-01-30
Supplement: 42003_2023_4463_MOESM2_ESM.pdf [file 42003_2023_4463_MOESM2_ESM.pdf]

# Supplementary Information

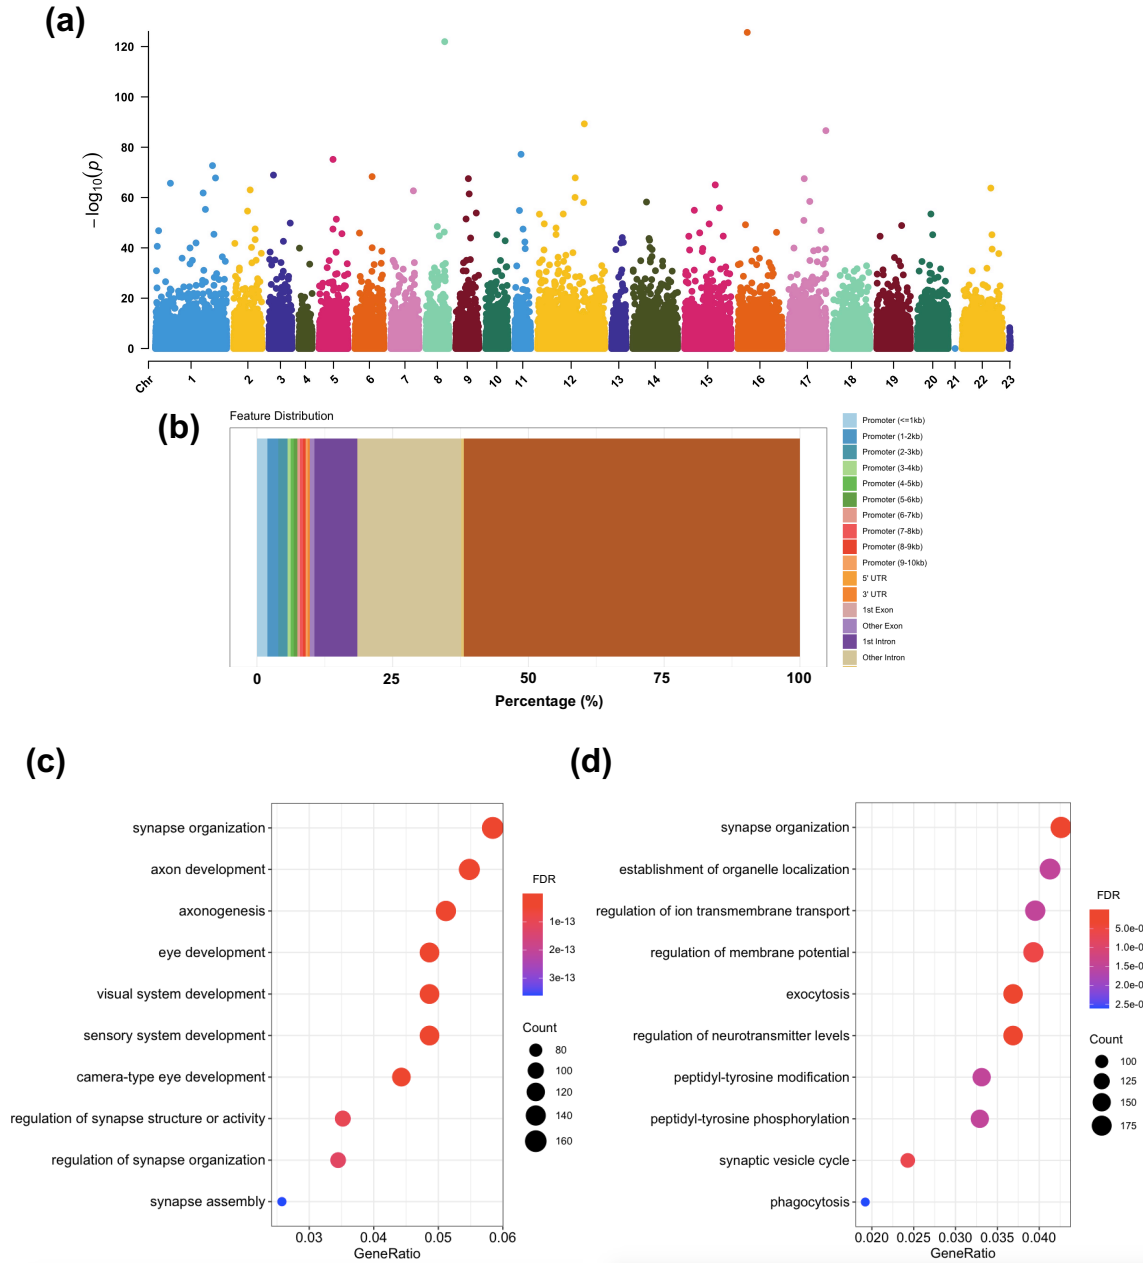

**Supplementary Figure 1: Distribution of DMLs.** (a) A Manhattan plot shows the genome-wide

distribution across all chromosomes (x-axis) of all CpGs tested for differential methylation (y-axis) between injured/regenerated (IR) ( $N = 12$  retinas) and injured/non-regenerated (INR) ( $N = 12$  retinas) RGC groups. (b) A modified bar plot shows the distribution of DMLs as annotated to standard genomic features. Varying genomic features are color-coordinated. The proportion of DMRs associated with each genomic feature are depicted by the width of each bar (x-axis). (c-d) A dot plot shows the top ten ontological terms of biological processes (y-axis) identified from genes linked to regeneration-associated hypermethylated and hypomethylated DMLs, respectively. The GeneRatio (x-axis) depicts the ratio of DML-associated genes over the number of genes in the entire genome that are associated with each term displayed. The size of the dots represents the relative number of DML-associated genes for each term. Dots are colored based on FDR  $P$ -value.

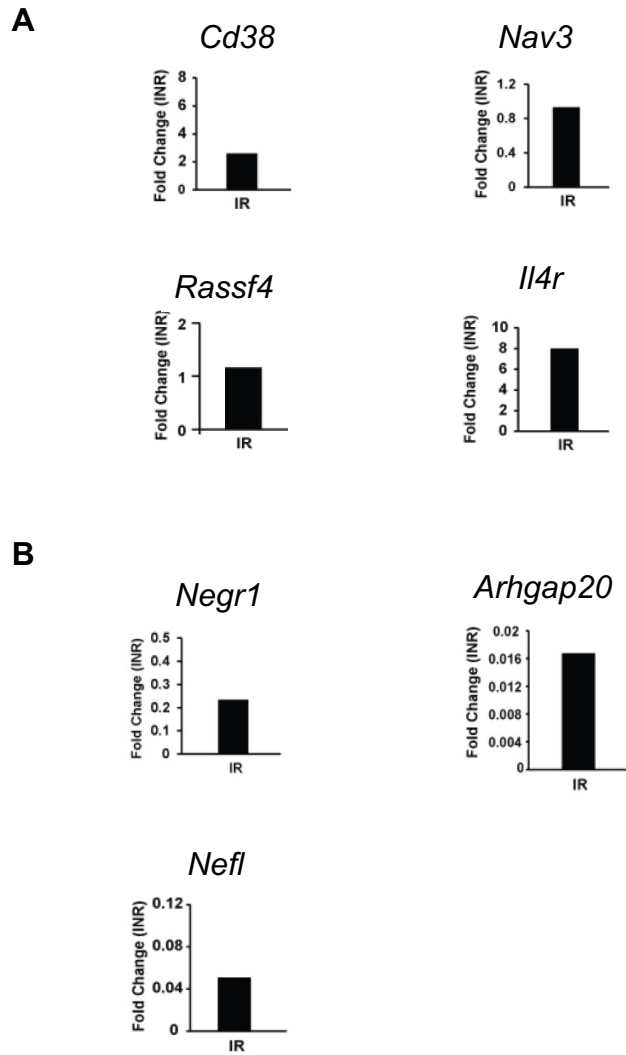

**Supplementary Figure 2: Quantitative-RT-PCR results of regeneration-associated genes harboring DMLs.** (a) Quantitative-RT-PCR results of four representative regeneration-associated genes containing DMLs that displayed significantly induced expression in injured/regenerated (IR) RGCs (x-axis) compared to injured/non-regenerated (INR) RGCs (fold-change; y-axis). (b)

Quantitative-RT-PCR results of three representative regeneration-associated genes containing DMLs that displayed significantly reduced expression in IR RGCs (x-axis) compared to INR RGCs (fold-change; y-axis).

**a**

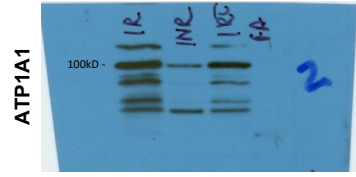

**b**

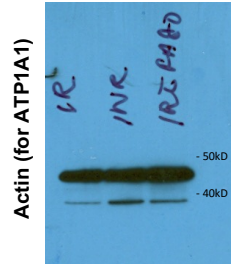

**c**

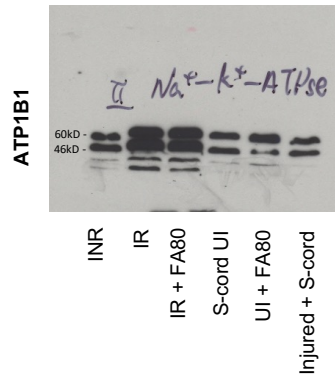

**d**

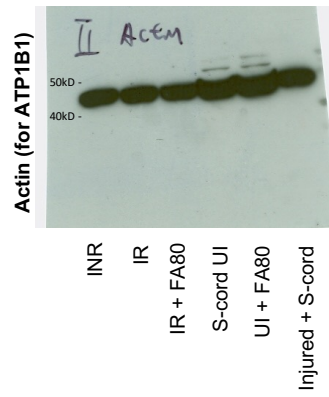

**Supplementary Figure 3: Full immunoblots of ATP1A1 and ATP1B1.** (a) A representative immunoblot staining for ATP1A1 is depicted. The first lane represents protein extracted from an injured/regenerated (IR) sample, the second lane represents extracts from an injured/non-regenerated (INR) sample, the third lane represents extracts used for other experiments not reported in this manuscript. (b) A representative immunoblot staining for actin for the ATP1A1 immunoblot. Samples run in each lane parallel those in (a). (c) A representative immunoblot staining for ATP1B1 is depicted. The first lane represents protein extracted from an injured/non-regenerated (INR) sample, the second lane represents extracts from an injured/regenerated (IR) sample, the third, fourth, fifth, and sixth lanes represent samples used for other experiments not reported in this manuscript. (d) A representative immunoblot staining for actin for the ATP1B1 immunoblot. Samples run in each lane parallel those in (c).

|       | Raw reads (million) | Reads passing QC (I) (million) | Aligned reads (I) (million) | Reads passing QC (II) (million) | Aligned reads (II) (million) | Total alignment efficiency (%) | Number of CpGs >=10x (million) |
|-------|---------------------|--------------------------------|-----------------------------|---------------------------------|------------------------------|--------------------------------|--------------------------------|
| IR.1  | 882.6               | 862.9                          | 495.2                       | 294.9                           | 100.1                        | 69                             | 13.1                           |
| IR.2  | 759.2               | 741.6                          | 420.9                       | 258.4                           | 88.5                         | 68.7                           | 11.3                           |
| IR.3  | 547.6               | 533.3                          | 287.6                       | 171.3                           | 43.6                         | 62.1                           | 6.7                            |
| INR.1 | 843.4               | 822.4                          | 454.2                       | 283.6                           | 104.2                        | 67.9                           | 17.6                           |
| INR.2 | 895.6               | 874.5                          | 452.4                       | 339.6                           | 127.9                        | 66.4                           | 18                             |
| INR.3 | 722.4               | 711.5                          | 309.6                       | 330.2                           | 125                          | 61.1                           | 16.6                           |
| UI.1  | 714.8               | 700.4                          | 384.3                       | 243.6                           | 91.5                         | 67.9                           | 17                             |
| UI.2  | 894.2               | 862.3                          | 485.2                       | 240.4                           | 77.4                         | 65.2                           | 16.5                           |
| UI.3  | 788.2               | 773.6                          | 420                         | 284                             | 107.6                        | 68.2                           | 18.1                           |
| E.1   | 749                 | 738.1                          | 419.2                       | 268.4                           | 104.7                        | 71                             | 17.2                           |
| E.2   | 793.6               | 780                            | 420.1                       | 296.9                           | 117                          | 68.9                           | 18.2                           |
| E.3   | 754.4               | 741.7                          | 393.8                       | 284.8                           | 107.6                        | 67.6                           | 18.1                           |

**Supplementary Table 1: Summary of whole-genome methylation sequencing analysis.**

| Transcription factor (hyper-DMRs) | Q-value |  | Transcription factor (hypo-DMRs) | Q-value |
|-----------------------------------|---------|--|----------------------------------|---------|
| DLX5                              | 0       |  | ELF5                             | 0       |
| DLX2                              | 0       |  | PU.1                             | 0       |
| Lhx3                              | 0       |  | Elf4                             | 0       |
| LHX9                              | 0       |  | ELF3                             | 0       |
| Lhx2                              | 0       |  | EHF                              | 0       |
| Lhx1                              | 0       |  | IRF8                             | 0       |
| DLX1                              | 0       |  | ETV1                             | 0       |
| Dlx3                              | 0.0001  |  | ELF1                             | 0       |
| En1                               | 0.002   |  | ETS1                             | 0       |
| Phox2a                            | 0.0022  |  | GABPA                            | 0       |
| Nkx6.1                            | 0.0022  |  | SpiB                             | 0       |
| GSC                               | 0.0022  |  | Fli1                             | 0       |
| Isl1                              | 0.0055  |  | EWS                              | 0.0001  |
| Brn1                              | 0.0058  |  | Etv2                             | 0.0006  |
| Prop1                             | 0.0067  |  | IRF1                             | 0.0009  |
|                                   |         |  | ERG                              | 0.0013  |
|                                   |         |  | ETV4                             | 0.0022  |

**Supplementary Table 2: Significantly enriched transcription factors in DMR sequences.**
