# Supplementary material for: Purified regenerating retinal neurons reveal regulatory role of DNA methylation-mediated Na+/K+-ATPase in murine axon regeneration
Source: PubMed Central journal article supplement (PMC9886953; doi:10.1038/s42003-023-04463-4), 2023-01-30
Supplement: 42003_2023_4463_MOESM3_ESM.pdf [file 42003_2023_4463_MOESM3_ESM.pdf]

## Description of Additional Supplementary Files

**File name:** Supplementary Data 1

**Description:** DML results.
